# Supplementary material for: Fine Mapping of a Major Backfat QTL Reveals a Causal Regulatory Variant Affecting the CCND2 Gene
Source: Front Genet. 2022 May 25;13:871516. doi: 10.3389/fgene.2022.871516 (PMC9180923; doi:10.3389/fgene.2022.871516)
Supplement: Supplementary file 1 [file Presentation1.zip]

Archive with 4 entries (4 files):
- Supplementary Material S1.PDF
- Supplementary Material S2.PDF
- Supplementary Material S3.PDF
- Supplementary Text S1.PDF
