# Supplementary material for: Fine Mapping of a Major Backfat QTL Reveals a Causal Regulatory Variant Affecting the CCND2 Gene
Source: Front Genet. 2022 May 25;13:871516. doi: 10.3389/fgene.2022.871516 (PMC9180923; doi:10.3389/fgene.2022.871516)
Supplement: Supplementary file 1 [file Presentation1.zip › Supplementary Material S1.PDF]

# Fine mapping of a major backfat QTL reveals a causal regulatory variant affecting the CCND2 gene

Haniel C. Oliveira<sup>1</sup>; Marcos S. Lopes<sup>2,3</sup>; Martijn F. L. Derks<sup>2,4</sup>;  
Ole Madsen<sup>4</sup>; Barbara Harlizius<sup>2</sup>; Maren van Son<sup>5</sup>; Eli H. Grindflek<sup>5</sup>;  
Marta Gòdia<sup>4</sup>; Arne B. Gjuvsland<sup>5</sup>; Pamela I. Otto<sup>6</sup>;  
Martien A. M. Groenen<sup>4</sup>; Simone E. F. Guimaraes<sup>1</sup>

<sup>1</sup>Federal University of Viçosa, Viçosa, Minas Gerais;

<sup>2</sup>Topigs Norsvin Research Center, Beuningen, Netherlands;

<sup>3</sup>Topigs Norsvin, Curitiba, Brazil;

<sup>4</sup>Animal Breeding and Genomics, Wageningen University & Research, Wageningen, the Netherlands;

<sup>5</sup>Norsvin SA, Hamar, Norway

<sup>6</sup>Universidade Federal de Santa Maria, Santa Maria, Brazil

# ATAC-Seq (PRJNA665194) and ChIP-Seq (PRJEB28147)

## Mapping

bwa-mem was used to map the reads against the pig reference genome

```
bwa mem pigReferenceGenome.fa -t 12 00-Fastq/sample1_R1.fastq.gz \
00-Fastq/sample1_R2.fastq.gz > 01-BWA_mapped/sample1_unsort_alig.sam"
```

convert into binary (bam) using samtools view

```
samtools view -@ 12 -bS \
01-BWA_mapped/sample1_unsort_alig.sam > \
01-BWA_mapped/sample1_unsort_alig.bam
```

sort the alignment file

```
samtools sort -@ 12 \
01-BWA_mapped/sample1_unsort_alig.bam > \
01-BWA_mapped/sample1_sort_alig.bam
```

keeping only paired end reads

```
samtools view -f 0x02 -b \
01-BWA_mapped/sample1_sort_alig.bam > \
01-BWA_mapped/sample1_sort_alig_PE.bam
```

remove PCR duplicates

```
samtools rmdup 01-BWA_mapped/sample1_sort_alig_PE.bam \
01-BWA_mapped/sample1_sort_alig.bam_PE_RD.bam
```

Only keep reads that are uniquely aligned against the genome

```
samtools view -@ 12 -b -q 10 \
01-BWA_mapped/sample1_sort_alig.bam_PE_RD.bam > \
01-BWA_mapped/sample1_sort_alig.bam_PE_RD_uniq.bam
```

Indexing the alignment

```
samtools index -@ 12 \
01-BWA_mapped/sample1_sort_alig.bam_PE_RD_uniq.bam
```

Removing MT reads

```
samtools idxstats \
01-BWA_mapped/sample1_sort_alig.bam_PE_RD_uniq.bam | cut -f1 | \
grep -v "MT" | xargs samtools view --threads 6 -b 01-BWA_mapped/ \
sample1_sort_alig.bam_PE_RD_uniq.bam > \
01-BWA_mapped/sample1_sort_alig.bam_PE_RD_uniq_noMT.bam
```

## Peak calling

The program MACS2 (<https://github.com/taoliu/MACS>) is probably the most used program to call ChIP-seq peaks (regions where there is an enrichment of your ChIP-seq mark).

```
macs2 callpeak -f BAMPE -t \  
01-BWA_mapped/sample1_sort_alig.bam_PE_RD_uniq_noMT.bam \  
-g hs --outdir 02-MACS2_broadPeaks -n sample1_broadPeaks \  
-B -q 0.05 --broad --broad-cutoff 0.05
```
