# Supplementary material for: Fine Mapping of a Major Backfat QTL Reveals a Causal Regulatory Variant Affecting the CCND2 Gene
Source: Front Genet. 2022 May 25;13:871516. doi: 10.3389/fgene.2022.871516 (PMC9180923; doi:10.3389/fgene.2022.871516)
Supplement: Supplementary file 1 [file Presentation1.zip › Supplementary Material S3.PDF]

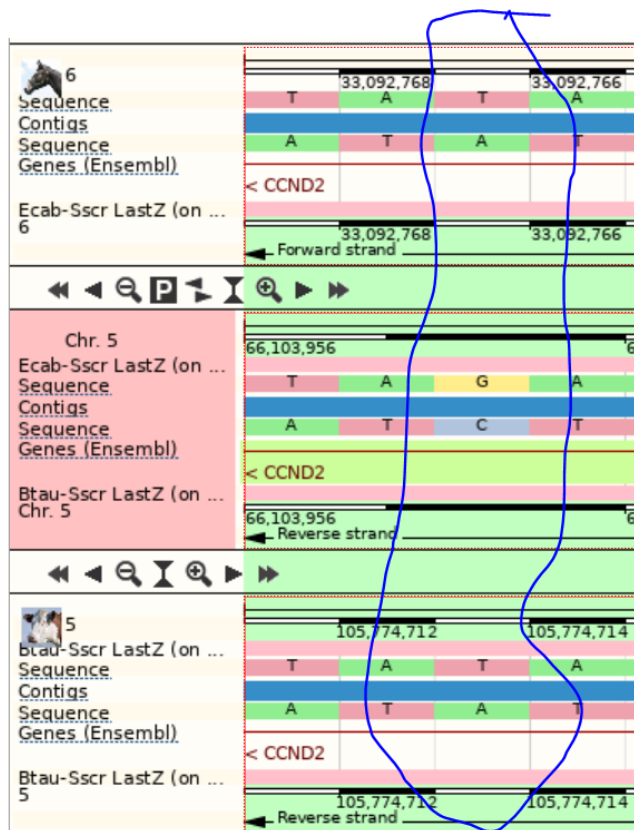

**Figure 1:** Region of lead SNP in horse and cow. Both species have the A allele at the lead SNP site.

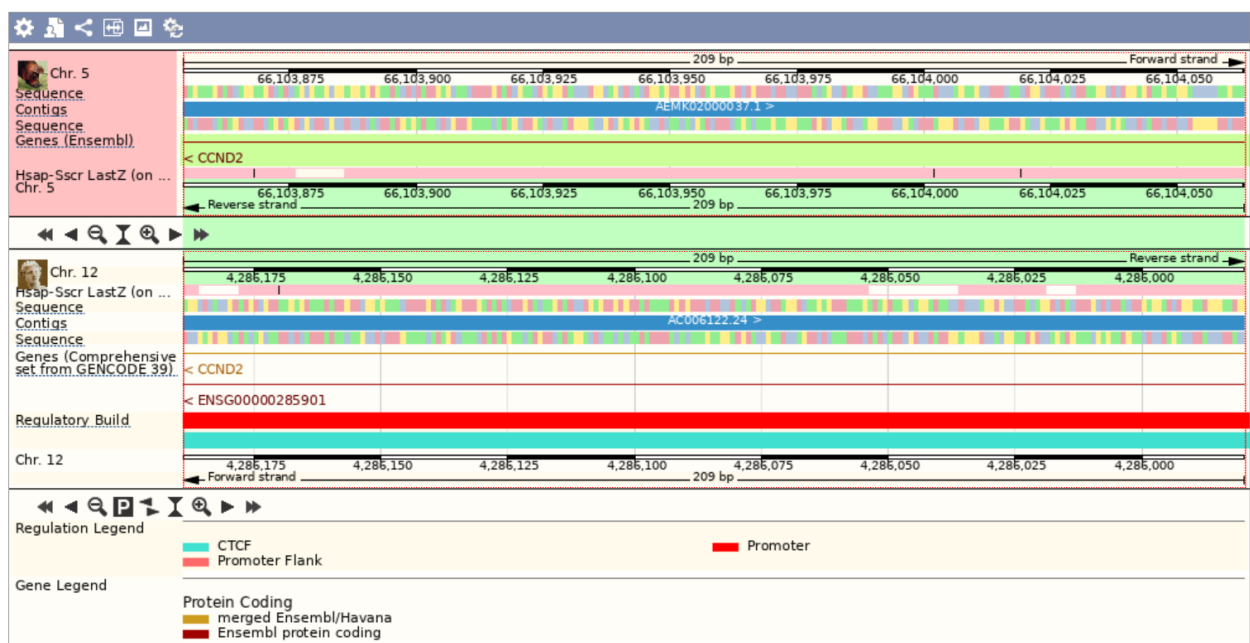

**Figure 2:** +/- 100 around lead SNP -> promoter and CTCF region in human.

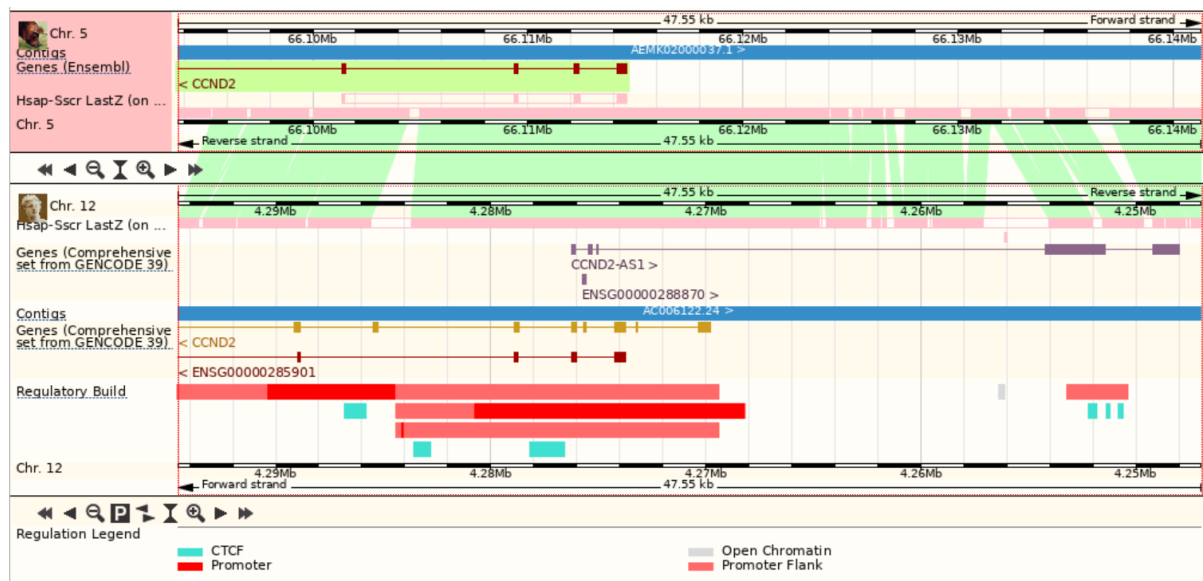

**Figure 3:** Region covering the core haplotype in pigs and human. Human annotation shows promoter regions in the homologous region.

**Table 1: Genotype of the lead SNP in European local breeds.**

| Sample  | Genotype | Breed                |
|---------|----------|----------------------|
| AS01F01 | 0/1      | Angler_Sattelschwein |
| AS01F09 | 0/1      | Angler_Sattelschwein |
| BB01M47 | 0/1      | Bunte_Bentheimer     |
| BB01M50 | 0/0      | Bunte_Bentheimer     |
| BK01F10 | 0/0      | Berkshire            |
| BK01M20 | 0/0      | Berkshire            |
| BS01F10 | 0/0      | British_Saddleback   |
| BS01F35 | 0/0      | British_Saddleback   |
| CA01F14 | 0/0      | Calabrese            |
| CM01F17 | 0/1      | Chato_Murciano       |
| CM01F18 | 0/1      | Chato_Murciano       |
| CS01F02 | 0/0      | Cinta_Senese         |
| CS01F05 | 0/0      | Cinta_Senese         |
| CT01F01 | 0/0      | Cassertana           |
| CT01F06 | 0/0      | Cassertana           |
| CT01F13 | 0/0      | Cassertana           |
| CT01M12 | 0/0      | Cassertana           |
| CT01M33 | 0/0      | Cassertana           |
| CT01M34 | 0/0      | Cassertana           |
| CT01M35 | 0/0      | Cassertana           |
| GO01F04 | 0/0      | Gloucester_Old_Spot  |
| GO01F23 | 0/0      | Gloucester_Old_Spot  |
| LB01F11 | 0/0      | Large_Black          |
| LB01F49 | 0/0      | Large_Black          |

|         |     |                |
|---------|-----|----------------|
| LE01F25 | 0/0 | Synthetic      |
| LS01F04 | 0/0 | Linderodsvinn  |
| LS01F09 | 0/1 | Linderodsvinn  |
| MA01F12 | 0/0 | Mangalica      |
| MA01F13 | 0/0 | Mangalica      |
| MA01F18 | 0/0 | Mangalica      |
| MA01F20 | 0/0 | Mangalica      |
| MA01M34 | 0/0 | Mangalica      |
| MA01M35 | .   | Mangalica      |
| MA01M37 | 0/0 | Mangalica      |
| MW01F29 | 0/0 | Middle_White   |
| MW01F33 | 0/0 | Middle_White   |
| NI01U07 | 0/0 | Negro_Iberico  |
| NI01U28 | 0/0 | Negro_Iberico  |
| NI01U37 | .   | Negro_Iberico  |
| NS01F05 | 0/0 | Nera_Siciliana |
| RE01F51 | .   | Retinto        |
| RE01F54 | 0/0 | Retinto        |
| RE01F62 | 0/0 | Retinto        |
| TA01F19 | 0/0 | Tamworth       |
| TA01M06 | 1/1 | Tamworth       |
